# Supplementary material for: Various Patterns of Composition and Accumulation of Steroids and Triterpenoids in Cuticular Waxes from Screened Ericaceae and Caprifoliaceae Berries during Fruit Development
Source: PubMed Central journal article supplement (PMC6864842; doi:10.3390/molecules24213826), 2019-10-23
Supplement: molecules-24-03826-s001.pdf [file molecules-24-03826-s001.pdf]

## Various Patterns of Composition and Accumulation of Steroids and Triterpenoids in Cuticular Waxes from Screened Ericaceae and Caprifoliaceae Berries during Fruit Development

**Table S1.** Retention times and characteristic ions of mass spectra of identified steroids and triterpenoids

| Range of retention time | Compound                             | Mass spectrum <i>m/z</i> (relative intensity)                                                                                                                                                                 |
|-------------------------|--------------------------------------|---------------------------------------------------------------------------------------------------------------------------------------------------------------------------------------------------------------|
| 31.8-32.0               | Cholesterol                          | 386 (26), 107 (50), 105 (48), 91 (57), 81 (54), 79 (46), 69 (47), 57 (87), 55 (73), 43 (100), 41 (55)                                                                                                         |
| 34.4-34.5               | Campesterol                          | 400 (30), 107 (51), 105 (55), 95 (49), 83 (45), 81 (64), 71 (62), 57 (77), 55 (77), 43 (100), 41 (52)                                                                                                         |
| 35.5-35.6               | Stigmasterol                         | 412 (36), 145 (64), 107 (52), 95 (100), 83 (66), 81 (90), 78 (60), 69 (67), 67 (85), 55 (69)                                                                                                                  |
| 37.4-37.6               | Sitosterol                           | 414 (29), 145 (54), 107 (59), 105 (60), 95 (54), 91 (49), 81 (57), 57 (68), 55 (70), 43 (100), 41 (44)                                                                                                        |
| 37.6-37.8               | Sitostanol                           | 416 (31), 215 (82), 109 (58), 107 (83), 95 (81), 93 (64), 81 (84), 69 (60), 57 (64), 55 (81), 43 (100)                                                                                                        |
| 37.9-38.0               | $\beta$ -Amyrenone                   | 424 (11), 219 (18), 218 (100), 205 (13), 203 (55), 189 (14), 109 (12), 95(16), 81 (12), 69 (14), 55 (15)                                                                                                      |
| 38.1-38.2               | Cycloartanol                         | 428 (4), 205 (60), 109 (98), 95 (100), 93 (64), 81 (69), 69 (78), 57 (73), 55 (82), 43 (89), 41 (67)                                                                                                          |
| 38.6-38.8               | $\beta$ -Amyrin                      | 426 (27), 219 (18), 218 (100), 203 (49), 189 (17), 135 (11), 109 (13), 105 (12), 95 (15), 81 (18), 69 (14)                                                                                                    |
| 40.0-40.2               | $\alpha$ -Amyrenone                  | 424 (12), 219 (19), 218 (100), 203 (24), 189 (16), 135 (19), 133 (18), 122 (18), 119 (17), 95 (16), 55 (18)                                                                                                   |
| 40.4-40.8               | $\alpha$ -Amyrin/<br>Lupeol          | 426 (4), 218 (100), 203 (20), 189 (36), 135 (35), 121 (32), 109 (32), 107 (34), 95 (40), 81 (33), 55 (31)<br>426 (18), 207 (67), 189 (90), 135 (83), 121 (80) 109 (85), 121 (80), 95 (100), 93 (87), 81 (86), |
| 40.9-41.1               | Tremulone (stigmasta-3,5-dien-7-one) | 410 (32), 187 (27), 174 (100), 161 (37), 159 (26), 91 (28), 57 (28), 55 (37), 43 (44), 41 (28)                                                                                                                |
| 41.3-41.5               | Fern-7-en-3 $\beta$ -ol              | 426 (12), 411 (72), 259 (100), 241 (54), 137 (54), 109 (58), 107 (62), 95 (93), 81 (77), 55 (80)                                                                                                              |
| 41.8-42.0               | 24-methylenecycloartanol             | 440 (5), 121 (60), 119 (55), 109 (62), 107 (76), 105 (57), 95 (98), 93 (64), 81 (72), 69 (99), 55 (100)                                                                                                       |
| 42.3-42.5               | Svert-9(11)-en-3 $\beta$ -ol         | 426 (27), 411 (82), 393 (29), 259 (100), 241 (63), 137 (30), 119 (32), 95 (45), 81 (28), 69 (31)                                                                                                              |
| 42.7-42.8               | Moretenol                            | 426 (15), 207 (42), 189 (100), 147 (18), 135 (24), 107 (25), 95 (40), 81 (35), 67 (22), 55 (23)                                                                                                               |
| 43.5-43.7               | D:C-friedours-7-en-3-ol              | 426 (7), 247 (100), 229 (78), 123 (49), 109 (54), 107 (48), 105 (48), 95 (77), 81 (55), 69 (66), 55 (59)                                                                                                      |

|           |                                            |                                                                                                             |
|-----------|--------------------------------------------|-------------------------------------------------------------------------------------------------------------|
| 44.3-44.5 | Taraxasterol                               | 426 (14), 207 (57), 189 (100), 135 (51), 121 (74), 109 (57), 107 (62), 95 (70), 93 (47), 81 (48), 67 (43)   |
| 46.2-46.4 | Friedelin                                  | 426 (6), 125 (65), 123 (78), 109 (82), 107 (46), 96 (62), 95 (94), 81 (77), 69 (100), 67 (56), 55 (71)      |
| 48.3-48.5 | Oleanolic aldehyde                         | 440 (2), 232 (28), 207 (20), 204 (39), 203 (100), 189 (29), 105 (18), 81 (19), 69 (20), 55 (29)             |
| 48.9-49.1 | Cycloart-23-ene-3,25-diol                  | 442 (10), 203 (48), 121 (73), 109 (100), 107 (82), 95 (75), 81 (91), 69 (54), 55 (62), 43 (77)              |
| 49.8-50.0 | Hopenone                                   | 424 (33), 205 (29), 189 (100), 107 (39), 95 (56), 93 (29), 81 (35), 69 (36), 55 (27), 41 (21)               |
| 51.4-51.6 | Ursolic aldehyde                           | 440 (1), 207 (26), 204 (23), 203 (100), 133 (42), 119 (18), 105 (18), 95 (18), 81 (18), 55 (18), 43 (20)    |
| 53.2-53.4 | Erythrodiol                                | 442 (1), 204 (17), 203 (100), 133 (7), 119 (9), 105 (8), 95 (9), 93 (8), 81 (8), 69 (9), 55 (8)             |
| 53.9-54.1 | 3,12-oleandione                            | 440 (25), 234 (92), 205 (98), 177 (98), 135 (73), 95 (100), 81 (60), 69 (72), 55 (89), 41 (55),             |
| 56.3-56.5 | Uvaol                                      | 442 (1), 207 (13), 204 (17), 203 (100), 133 (33), 119 (13), 105 (11), 95 (12), 81 (10), 69 (10), 55 (11)    |
| 57.8-58.0 | Betulin                                    | 442 (8), 203 (100), 189 (77), 133 (66), 121 (55), 107 (57), 105 (49), 95 (56), 93 (54), 81 (67)             |
| Acids*:   |                                            |                                                                                                             |
| 22.4-22.6 | Olean-2,12-dien-28-oic acid methyl ester   | 452(11), 425 (9), 263 (11), 262 (61), 221 (14), 203 (100), 190 (15), 189 (22), 133 (14), 119 (12)           |
| 25.1-25.3 | Ursa-2,12-dien-28-oic acid methyl ester    | 452 (12), 425 (9), 263 (20), 262 (100), 221 (27), 203 (79), 190 (18), 189 (27), 133 (58), 119 (23)          |
| 25.5-25.6 | 3-Oxo-olean-12-en-28-oic acid methyl ester | 468 (6), 262 (32), 204 (17), 203 (100), 202 (21), 189 (29), 133 (17), 119 (14), 105 (12), 55 (12)           |
| 26.9-27.2 | Oleanolic acid methyl ester                | 470 (1), 262 (48), 207 (13), 204 (16), 203 (100), 202 (21), 189 (22), 133 (17), 119 (13), 105 (14)          |
| 28.0-28.2 | 3-Oxo-urs-12-en-28-oic acid methyl ester   | 468 (3), 263 (21), 262 (96), 249 (20), 204 (17), 203 (100), 189 (29), 133 (79), 119 (30), 105 (19)          |
| 29.8-30.2 | Ursolic acid methyl ester                  | 470 (1), 263 (20), 262 (100), 207 (32), 203 (93), 189 (29), 133 (76), 119 (34), 105 (21), 95 (18)           |
| 32.0-32.2 | Maslinic acid methyl ester                 | 486 (2), 263 (10), 262 (53), 204 (17), 203 (100), 202 (20), 189 (20), 133 (16), 119 (13), 105 (12), 69 (10) |
| 34.6-34.8 | Corosolic acid methyl ester                | 486 (1), 263 (15), 262 (74), 204 (17), 203 (100), 202 (22), 189 (21), 119 (18), 105 (14), 55 (12)           |
| 43.0-43.4 | Pomolic acid methyl ester                  | 486 (3) 263 (12), 263 (55), 204 (16), 203 (100), 202 (20), 189 (17), 119 (12), 105 (10), 75 (14)            |

\*retention times of methyl esters analyzed under isothermal conditions

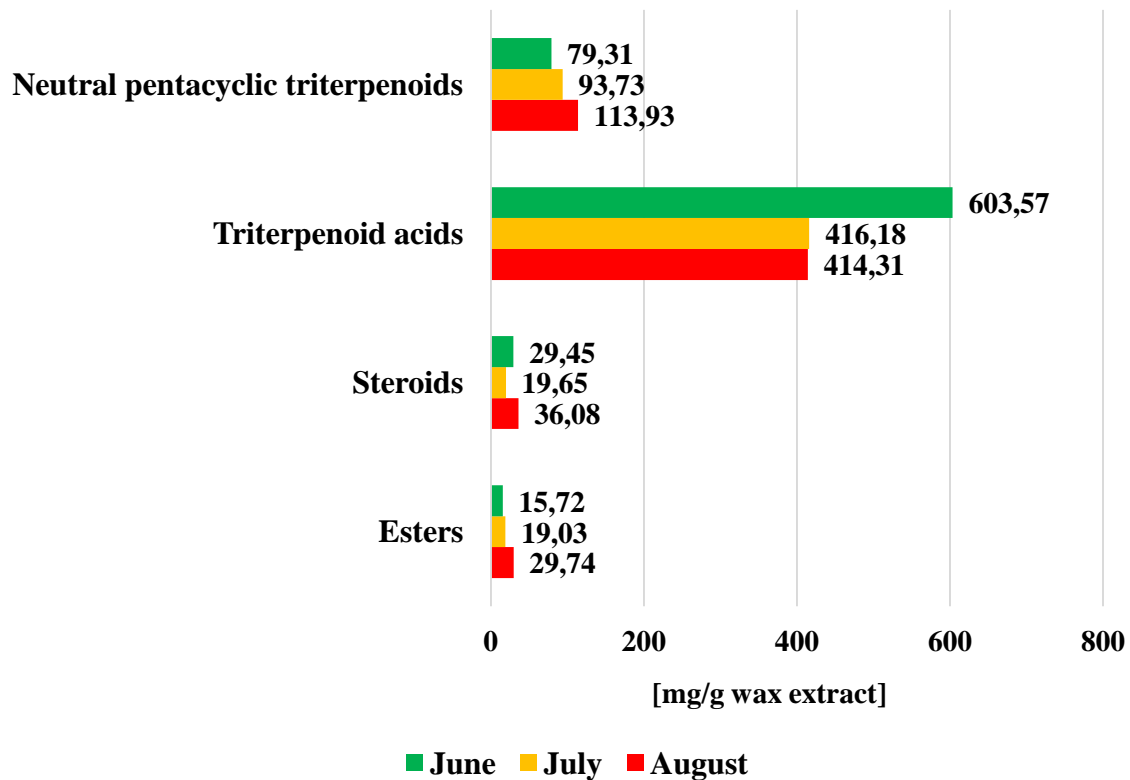

Figure S1. Changes in the content of triterpenoids in cuticular waxes during lingonberry *Vaccinium vitis-idaea* fruit development.

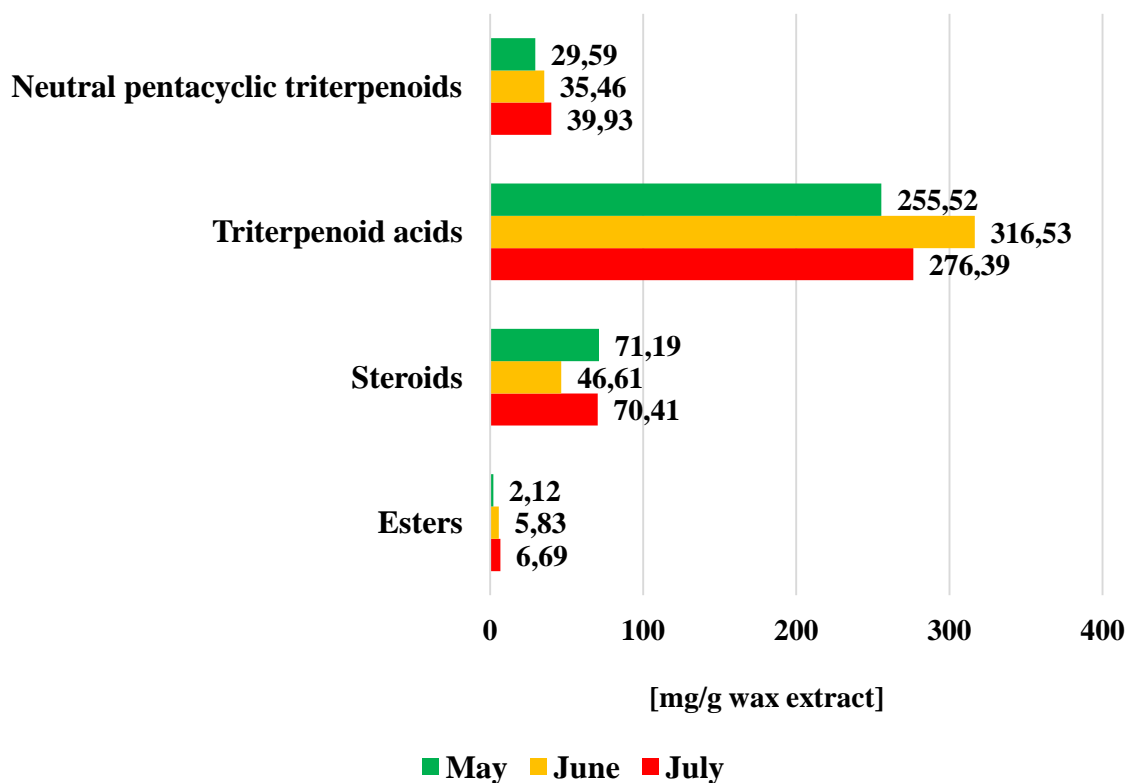

Figure S2. Changes in the content of triterpenoids in cuticular waxes during bilberry *Vaccinium myrtillus* fruit development.

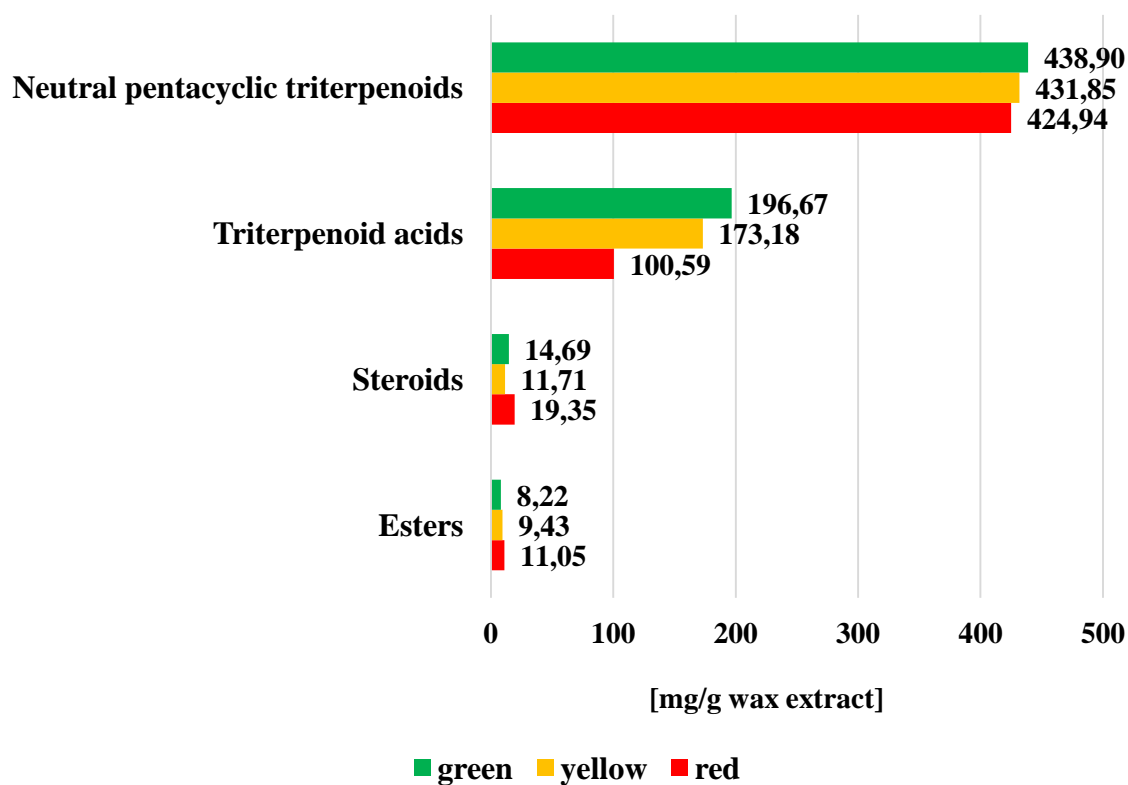

Figure S3. Changes in the content of triterpenoids in cuticular waxes during strawberry tree *Arbutus unedo* fruit development.

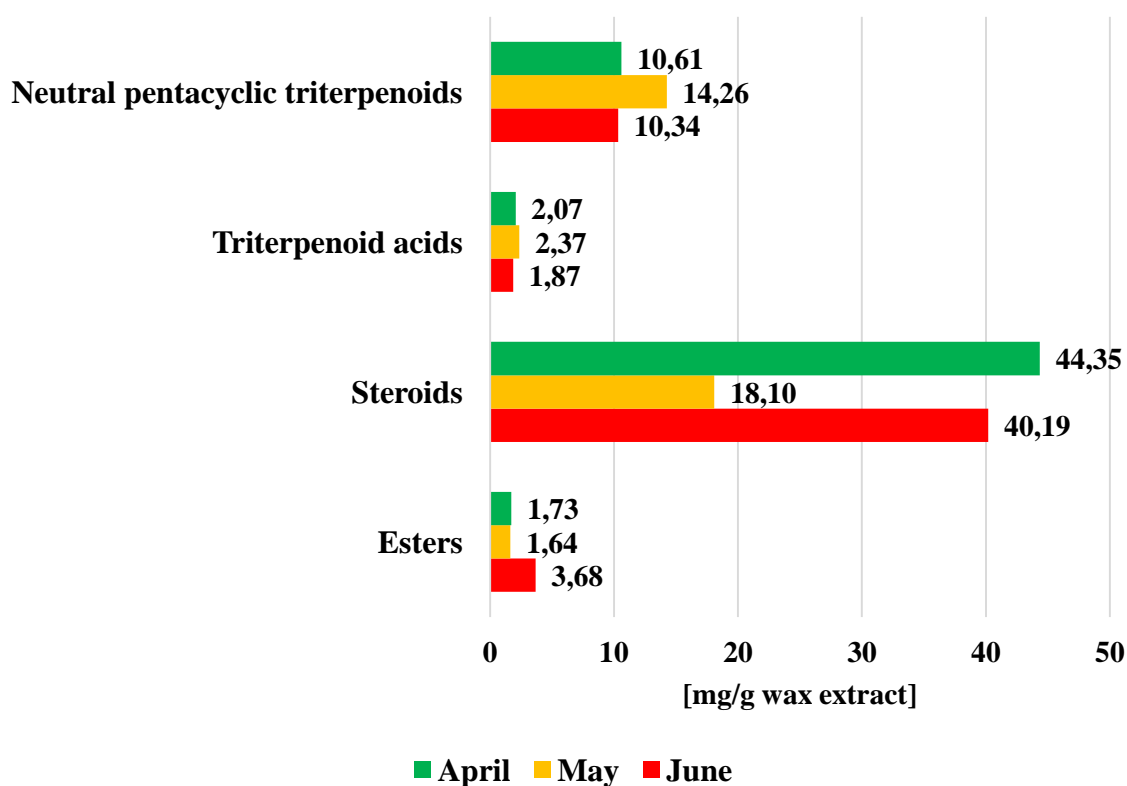

Figure S4. Changes in the content of triterpenoids in cuticular waxes during honeysuckle *Lonicera caerulea* fruit development.
